# Supplementary material for: Attitudes of Medical Workers Toward Artificial Intelligence in Ophthalmology: A Comparative Survey
Source: Research Square preprint supplement (doi:10.21203/rs.3.rs-195130/v1), 2021-02-09
Supplement: Supplementary file 1 [file 89b93ae06a390652a45c9d86.docx]

Ophthalmology Artificial Intelligence Questionnaire Survey

Dear Experts,

This questionnaire investigates your current knowledge of artificial intelligence. Your participation will be anonymous. The collected data and the results in the questionnaire will be published in literature. **Completing and submitting this questionnaire means you agree to participate in the study and agree with the statistical use and publication of the survey data.** Thanks for your valuable time!

1 Your gender is:

Male

Female

2 Your age is:

25 or less

25-45

45 or more

3 Your work area is:

Medical worker (health care worker or medical student)

Other professional technicians

4 Your place of residence is:

Provincial capital

Prefecture-level city

County and below

Abroad

5 Your education is:

PhD and above

Master's degree

Bachelor's degree

College or below

6 Your professional title is:

Ungraded

Primary

Intermediate

Advanced

7 Do you know artificial intelligence?

Completely

Almost

A little

Not understand

8 Do you know medical artificial intelligence?

Completely

Almost

A little

Not understand

9 Do you know ophthalmic artificial intelligence?

Completely

Almost

A little

Not understand

10 Do you know the current development of ophthalmic artificial intelligence?

Very good

Good

Average

Poor

11 Do you think Ophthalmic AI will replace ophthalmologists?

Completely

Partly

Not

Not understand

12 Do you have any experience with ophthalmic AI?

Being using or about to use

Having applied

Having experienced

Having no related experience

13 Do you accept the ophthalmic AI?

Completely

Partly

Not accept

Strongly resist

14 What are your concerns about ophthalmic AI? (multiple selection)

Medical responsibilities are unclear

Service price is too expensive

Service quality is difficult to guarantee

Medical ethical risk

Policy support may not be in place

Others

15 Is it necessary to strengthen the study of medical ethics in the ophthalmic AI field?

Yes

No
